# Supplementary material for: Incidence, management and outcome of women requiring massive transfusion after childbirth in the Netherlands: secondary analysis of a nationwide cohort study between 2004 and 2006
Source: Springer Nature journal article supplement (doi:10.1186/s12884-017-1384-7), 2017-06-19
Supplement: MOESM1 [file 12454648]

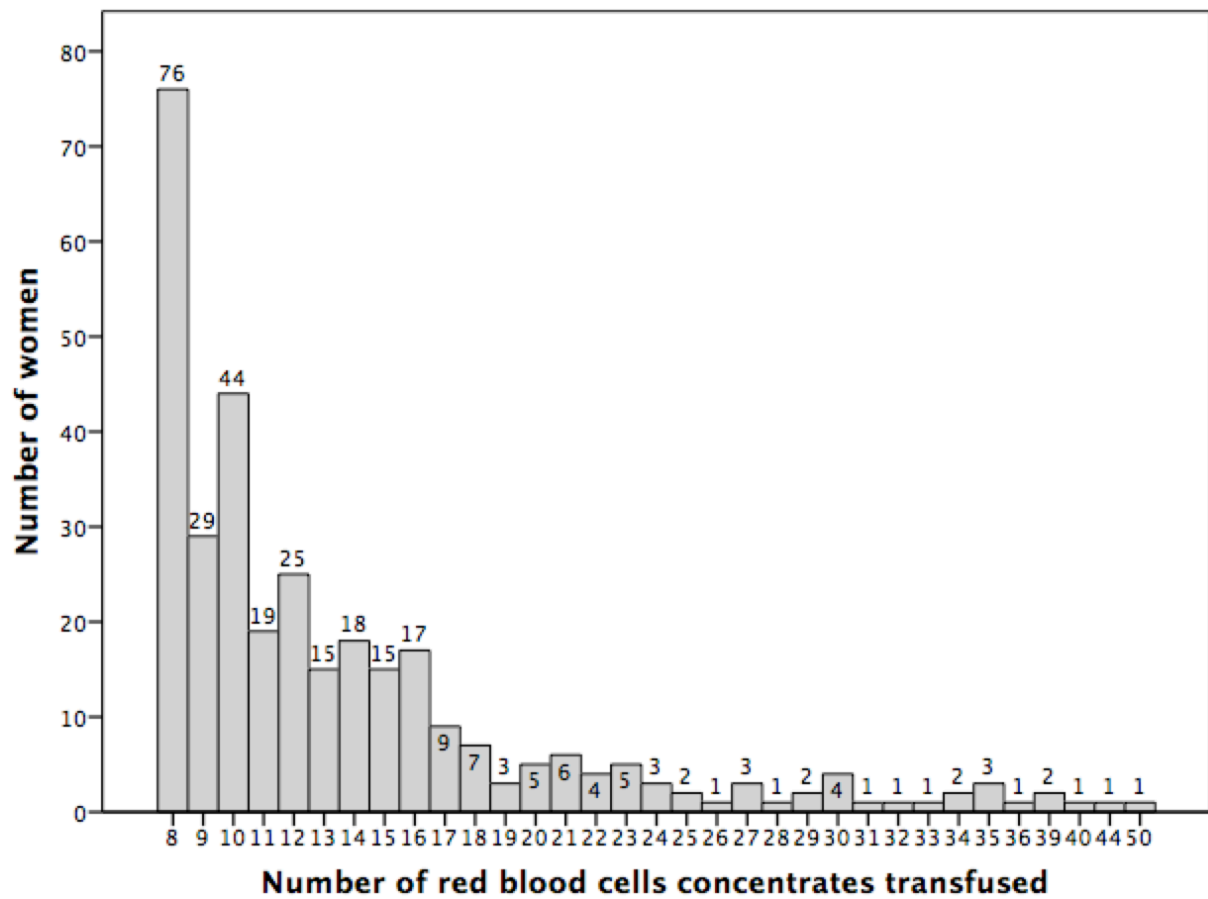

Additional file 1. Distribution of the number of red blood cells concentrates transfused.
